# Supplementary material for: Effect of Thermophilic Nitrate Reduction on Sulfide Production in High Temperature Oil Reservoir Samples
Source: PubMed Central journal article supplement (PMC5581841; doi:10.3389/fmicb.2017.01573), 2017-08-29
Supplement: Data_Sheet_1.pdf [file Data_Sheet_1.pdf]

*Supplementary Material*

**Effect of thermophilic nitrate-reduction on sulfide production in high temperature oil reservoir samples**

**Gloria Ngozi Okpala<sup>1</sup>, Chuan Chen<sup>2</sup>, Tekle Fida<sup>1</sup> and Gerrit Voordouw<sup>1\*</sup>**

**\* Correspondence:**

Corresponding Author: Gerrit Voordouw: [voordouw@ucalgary.ca](mailto:voordouw@ucalgary.ca)

## 1 Supplementary Figures and Tables

**Table S1 | Microbial community compositions of samples PW1\_14 (PW) and IW1\_14 (IW) derived from pyrosequencing.** The fractions of total reads are indicated for each taxon. Fractions in excess of 1% are indicated in bold.

| #  | Taxonomy                                                                                       | PW          | IW           |
|----|------------------------------------------------------------------------------------------------|-------------|--------------|
|    |                                                                                                | V38_1843    | V38_1844     |
| 1  | Proteobacteria;Alphaproteobacteria;NA__DB1-14;                                                 | 0           | <b>2.1</b>   |
| 2  | Proteobacteria;Alphaproteobacteria;NA__OCS116-clade;                                           | 0           | <b>4.23</b>  |
| 3  | Proteobacteria;Alphaproteobacteria;Rhodobacterales;Rhodobacteraceae;                           | 0           | 0.93         |
| 4  | Proteobacteria;Alphaproteobacteria;Rhodobacterales;Rhodobacteraceae;_Roseovarius;              | 0           | 0.66         |
| 5  | Proteobacteria;Alphaproteobacteria;Rhodobacterales;Rhodobacteraceae;Celeribacter;              | 0           | <b>5.1</b>   |
| 6  | Proteobacteria;Alphaproteobacteria;Rhodospirillales;Rhodospirillaceae;Nisaea;                  | 0           | 0.95         |
| 7  | Proteobacteria;Alphaproteobacteria;Rhodospirillales;Rhodospirillaceae;Thalassospira;           | 0           | <b>5.72</b>  |
| 8  | Proteobacteria;Alphaproteobacteria;Sneathiellales;Sneathiellaceae;Sneathiella;                 | 0           | 0.32         |
| 9  | Proteobacteria;Alphaproteobacteria;Sphingomonadales;Sphingomonadaceae;Sphingorhabdus;          | 0           | 0.34         |
| 10 | Proteobacteria;AlphaproteobacteriaRhodobacterales;Rhodobacteraceae;Pseudophaeobacter;          | 0           | 0.66         |
| 11 | Proteobacteria;Betaproteobacteria;Rhodocyclales;Rhodocyclaceae;                                | 0           | <b>24.76</b> |
| 12 | Proteobacteria;Deltaproteobacteria;Desulfovibrionales;Desulfobalobacteriaceae;Desulfonauticus; | 0.32        | 0            |
| 13 | Proteobacteria;Gammaproteobacteria;Alteromonadales;Alteromonadaceae;Alteromonas;               | 0           | 0.35         |
| 14 | Proteobacteria;Gammaproteobacteria;Alteromonadales;Alteromonadaceae;Marinobacter;              | 0           | 0.54         |
| 15 | Proteobacteria;Gammaproteobacteria;Alteromonadales;Shewanellaceae;Shewanella;                  | 0           | 0.96         |
| 16 | Proteobacteria;Gammaproteobacteria;Oceanospirillales;Alcanivoracaceae;Alcanivorax;             | 0           | <b>4.51</b>  |
| 17 | Proteobacteria;Gammaproteobacteria;Oceanospirillales;Oceanospirillaceae;Litoribacillus;        | 0           | 0.93         |
| 18 | Proteobacteria;Gammaproteobacteria;Oceanospirillales;Oceanospirillaceae;Neptuniibacter;        | 0           | <b>33.2</b>  |
| 19 | Proteobacteria;Gammaproteobacteria;Pseudomonadales;Pseudomonadaceae;Pseudomonas;               | <b>6.88</b> | 0.48         |
| 20 | Proteobacteria;Gammaproteobacteria;Thiotrichales;Piscirickettsiaceae;Cycloclasticus;           | 0           | <b>3.03</b>  |
| 21 | Proteobacteria;Gammaproteobacteria;Thiotrichales;Piscirickettsiaceae;Methylophaga;             | 0           | <b>5.53</b>  |
| 22 | ProteobacteriaGammaproteobacteria;Alteromonadales;olwelliaceae;Colwellia;                      | 0           | 0.98         |
| 23 | Bacteroidetes;Flavobacteriia;Flavobacteriales;Flavobacteriaceae;Mesoflavibacter;               | 0           | 0.58         |
| 24 | Bacteroidetes;Flavobacteriia;Flavobacteriales;Flavobacteriaceae;Ulvibacter;                    | 0           | <b>2.8</b>   |
| 25 | Firmicutes;Clostridia;Clostridiales;Clostridiaceae-4;Caminicella;                              | 0.2         | 0            |
| 26 | Firmicutes;Clostridia;Thermoanaerobacterales;Thermoanaerobacteraceae;Thermoanaerobacter;       | <b>78.2</b> | 0            |
| 27 | Thermotogae;Thermotogae;Thermotogales;Thermotogaceae;Thermosipho;                              | 0.74        | 0            |
| 28 | Euryarchaeota;Archaeoglobi;Archaeoglobales;Archaeoglobaceae;Archaeoglobus;                     | <b>1.7</b>  | 0            |
| 29 | Euryarchaeota;Methanococci;Methanococcales;Methanococcaceae;Methanothermococcus;               | <b>7.08</b> | 0            |
| 30 | Euryarchaeota;Methanomicrobia;Methanosarcinales;Methermicoccaceae;Methermicoccus;              | <b>2.21</b> | 0.01         |
| 31 | Euryarchaeota;Thermococci;Thermococcales;Thermococcaceae;Thermococcus;                         | <b>2.19</b> | 0            |
|    | <b>Total number of reads</b>                                                                   | <b>6472</b> | <b>6857</b>  |

**Table S2 | Microbial community composition of injection water and produced water samples collected in 2015 derived from Illumina sequence data.** The fractions of total reads are indicated for each taxon. Fractions in excess of 1% are indicated in bold.

|    | Sample name                               | IW1_15      | PW1_15      | IW5_15      | PW_F2_5_15  |
|----|-------------------------------------------|-------------|-------------|-------------|-------------|
|    | Group name                                | V48_2558    | V45_2319    | V48_2565    | V48_2566    |
|    | Number of high quality reads              | 50990       | 28927       | 24127       | 13410       |
| #  | Class/Genus                               |             |             |             |             |
| 1  | <i>Alphaproteobacteria; Roseovarius</i>   | <b>6.3</b>  | 0.9         | 0.4         | 0.0         |
| 2  | <i>Alphaproteobacteria;Caulobacter</i>    | 0.0         | 0.0         | 0.0         | <b>10.3</b> |
| 3  | <i>Alphaproteobacteria;Maritimibacter</i> | 0.6         | 0.4         | <b>26.5</b> | 0.0         |
| 4  | <i>Alphaproteobacteria;Sulfitobacter</i>  | <b>22.3</b> | <b>24.5</b> | <b>2.2</b>  | 0.0         |
| 5  | <i>Alphaproteobacteria;Thalassospira</i>  | 0.0         | 0.0         | <b>1.5</b>  | 0.0         |
| 6  | <i>Betaproteobacteria;Aquabacterium</i>   | 0.0         | 0.0         | 0.0         | <b>13.8</b> |
| 7  | <i>Betaproteobacteria;Burkholderia</i>    | 0.0         | 0.0         | 0.0         | <b>12.1</b> |
| 8  | <i>Betaproteobacteria;Roseateles</i>      | 0.0         | 0.0         | 0.0         | <b>7.9</b>  |
| 9  | <i>Gammaproteobacteria;Acinetobacter</i>  | 0.0         | 0.0         | 0.0         | <b>2.9</b>  |
| 10 | <i>Gammaproteobacteria;Alteromonas</i>    | <b>30.6</b> | <b>18.2</b> | 0.6         | 0.0         |
| 11 | <i>Gammaproteobacteria;Beggiatoa</i>      | 0.0         | 0.0         | 0.0         | <b>3.6</b>  |
| 12 | <i>Gammaproteobacteria;Colwellia</i>      | 0.9         | 0.2         | 0.4         | 0.0         |
| 13 | <i>Gammaproteobacteria;Klebsiella</i>     | 0.0         | 0.0         | <b>4.7</b>  | <b>16.0</b> |
| 14 | <i>Gammaproteobacteria;Marinobacter</i>   | 0.2         | <b>2.7</b>  | 0.8         | 0.0         |
| 15 | <i>Gammaproteobacteria;Methylophaga</i>   | 0.0         | 0.2         | <b>11.9</b> | 0.0         |
| 16 | <i>Gammaproteobacteria;Neptuniibacter</i> | <b>9.2</b>  | 0.2         | 0.5         | 0.0         |
| 17 | <i>Gammaproteobacteria;Oceanobacter</i>   | <b>3.3</b>  | <b>37.9</b> | <b>1.3</b>  | 0.0         |
| 18 | <i>Gammaproteobacteria;Porticoccus</i>    | <b>1.2</b>  | 0.0         | <b>2.8</b>  | 0.0         |
| 19 | <i>Gammaproteobacteria;Pseudomonas</i>    | 0.0         | <b>7.1</b>  | 0.0         | <b>26.6</b> |
| 20 | <i>Gammaproteobacteria;Shewanella;</i>    | 0.0         | 0.1         | 0.8         | 0.0         |
| 21 | <i>GammaproteobacteriaThiomicrospira</i>  | 0.0         | 0.0         | <b>42.0</b> | 0.0         |
| 22 | <i>Actinobacteria;Microbacteriaceae</i>   | 0.0         | 0.0         | 0.0         | <b>2.9</b>  |
| 23 | <i>Actinobacteria;Rhodococcus</i>         | 0.0         | 0.0         | 0.0         | <b>2.7</b>  |
| 24 | <i>Bacilli;Streptococcus</i>              | 0.0         | 0.0         | 0.0         | <b>1.1</b>  |
| 25 | <i>Bacteroidetes;Flavobacteriales</i>     | <b>1.1</b>  | 0.2         | 0.0         | 0.0         |
| 26 | <i>Bacteroidetes;Maribacter</i>           | <b>3.2</b>  | <b>1.3</b>  | 0.0         | 0.0         |
| 27 | <i>Bacteroidetes;Polaribacter</i>         | 0.6         | 0.5         | 0.0         | 0.0         |
| 28 | <i>Bacteroidetes;Psychroserpens</i>       | <b>20.3</b> | <b>4.5</b>  | 0.0         | 0.0         |
| 29 | <i>Flavobacteriia;Lutibacter</i>          | 0.0         | 0.0         | <b>3.4</b>  | 0.0         |
| 30 | <i>Methanococci;Methanothermococcus</i>   | 0.0         | 0.7         | 0.0         | 0.0         |
| 31 | <i>Thermococci;Thermococcus</i>           | 0.0         | 0.4         | 0.0         | 0.0         |

**Table S3 | Number of quality controlled (QC) reads, number of derived operational taxonomic units (OTUs) as extrapolated by Chao and Shannon diversity index for the tSRB inoculum and derived enrichments as in Figure 5.**

| <b>Sample</b> | <b>Raw reads</b> | <b>QC_reads</b> | <b>OTUs_chao</b> | <b>Shannon</b> |
|---------------|------------------|-----------------|------------------|----------------|
| tSRB_inoculum | 83330            | 29245           | 292              | 3.30           |
| 55°C          | 83364            | 26896           | 29               | 0.11           |
| 60°C          | 68412            | 19974           | 44               | 0.23           |
| 65°C          | 65892            | 17579           | 39               | 0.32           |

**Table S4 | Microbial community compositions of tSRB inoculum and of tSRB grown at 55, 60 and 65 °C, as in Figure 5. Fractions in excess of 1% are in bold.**

| #Taxon (Phylum, class, genus)                                 | tSRB_inoculum | 55°C         | 60°C         | 65°C         |
|---------------------------------------------------------------|---------------|--------------|--------------|--------------|
| <i>Proteobacteria; Alphaproteobacteria; Bradyrhizobiaceae</i> | 0             | 0.04         | 0.01         | 0.05         |
| <i>Proteobacteria; Alphaproteobacteria; Caulobacter</i>       | 0.08          | 0.23         | 0.34         | 0.43         |
| <i>Proteobacteria; Betaproteobacteria; Aquabacterium</i>      | 0.12          | 0.13         | 0.32         | 0.75         |
| <i>Proteobacteria; Betaproteobacteria; Burkholderia</i>       | 0.07          | 0.11         | 0.21         | 0.39         |
| <i>Proteobacteria; Betaproteobacteria; Roseateles</i>         | 0.05          | 0.07         | 0.06         | 0.4          |
| <i>Proteobacteria; Betaproteobacteria; Thauera</i>            | <b>14.92</b>  | 0.01         | 0.01         | 0.25         |
| <i>Proteobacteria; Deltaproteobacteria; Desulfovibrio</i>     | <b>3.03</b>   | 0            | 0            | 0            |
| <i>Proteobacteria; Gammaproteobacteria; Acidibacter</i>       | 0.01          | 0.02         | 0.07         | 0.12         |
| <i>Proteobacteria; Gammaproteobacteria; Acinetobacter</i>     | 0.12          | 0.02         | 0.05         | 0.13         |
| <i>Proteobacteria; Gammaproteobacteria; Marinobacter</i>      | <b>2</b>      | 0            | 0            | 0            |
| <i>Proteobacteria; Gammaproteobacteria; Pseudomonas</i>       | <b>5.41</b>   | 0.35         | 0.76         | <b>1.13</b>  |
| <i>Proteobacteria; Gammaproteobacteria; Shewanella</i>        | <b>1.83</b>   | 0            | 0            | 0            |
| <i>Actinobacteria; Microbacteriaceae</i>                      | 0.03          | 0.05         | 0.09         | 0.13         |
| <i>Actinobacteria; Propionibacterium</i>                      | 0.53          | 0.04         | 0.16         | 0.05         |
| <i>Bacteroidetes; Sphingobacteriia; Sediminibacterium</i>     | 0.03          | 0.04         | 0.15         | 0.09         |
| <i>Deinococcus-Thermus; Deinococci; Thermus</i>               | <b>25.31</b>  | 0            | 0.01         | 0            |
| <i>Firmicutes; Bacilli; Anoxybacillus</i>                     | <b>8.82</b>   | 0            | 0            | 0            |
| <i>Firmicutes; Bacilli; Staphylococcus</i>                    | 0.1           | 0            | 0.13         | 0.05         |
| <i>Firmicutes; Clostridia; Desulfitispora</i>                 | <b>2.51</b>   | 0            | 0            | 0            |
| <i>Firmicutes; Clostridia; Desulfotomaculum</i>               | <b>7.56</b>   | <b>98.76</b> | <b>97.17</b> | <b>95.47</b> |
| <i>Euryarchaeota; Methanomicrobia; Methanoculleus</i>         | <b>2.7</b>    | 0            | 0            | 0            |

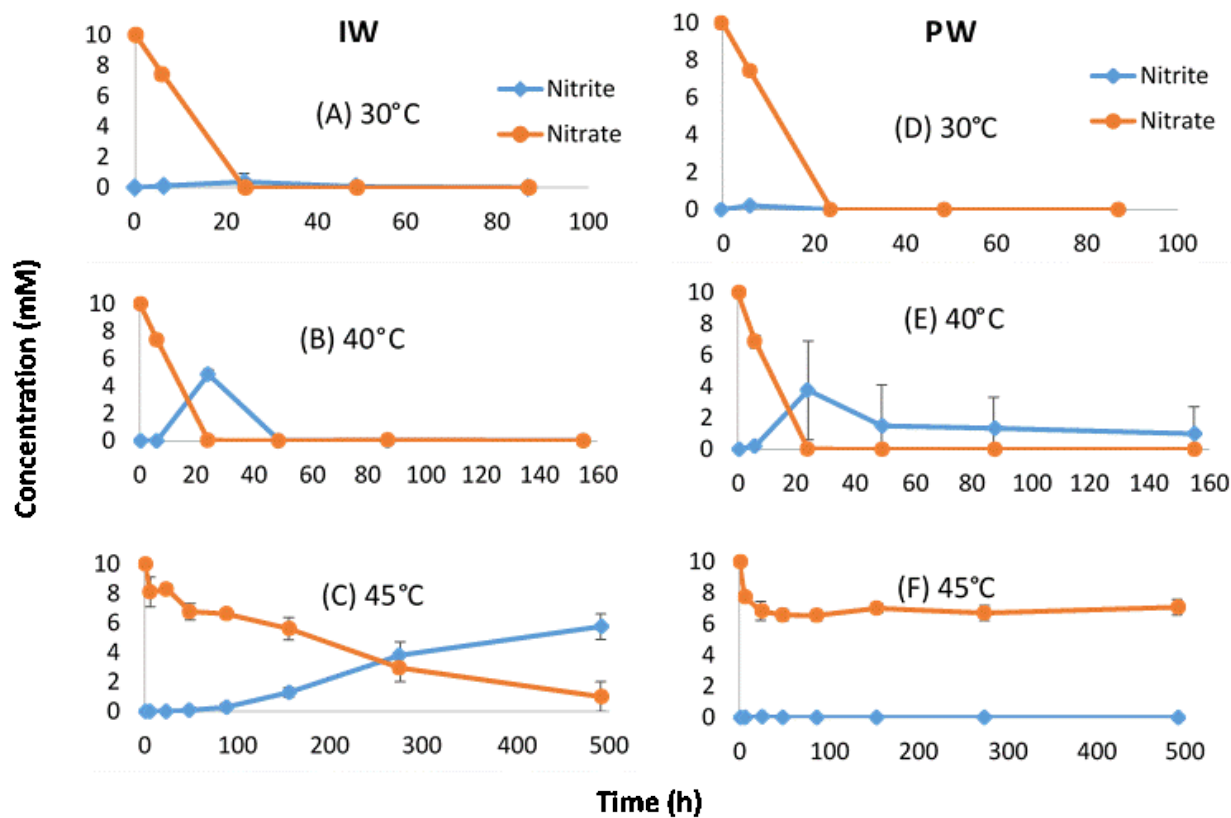

**Figure S1: Temperature dependence of nitrate reduction of IW1\_15 (a-c) and PW1\_15 (d-f) samples, collected from the Terra Nova oil field in January 2015.** The medium containing 3 mM VFA and 10 mM nitrate was inoculated with 1 ml of 50-fold concentrated IW or PW. The data are averages and standard deviations for three different incubations for each temperature.

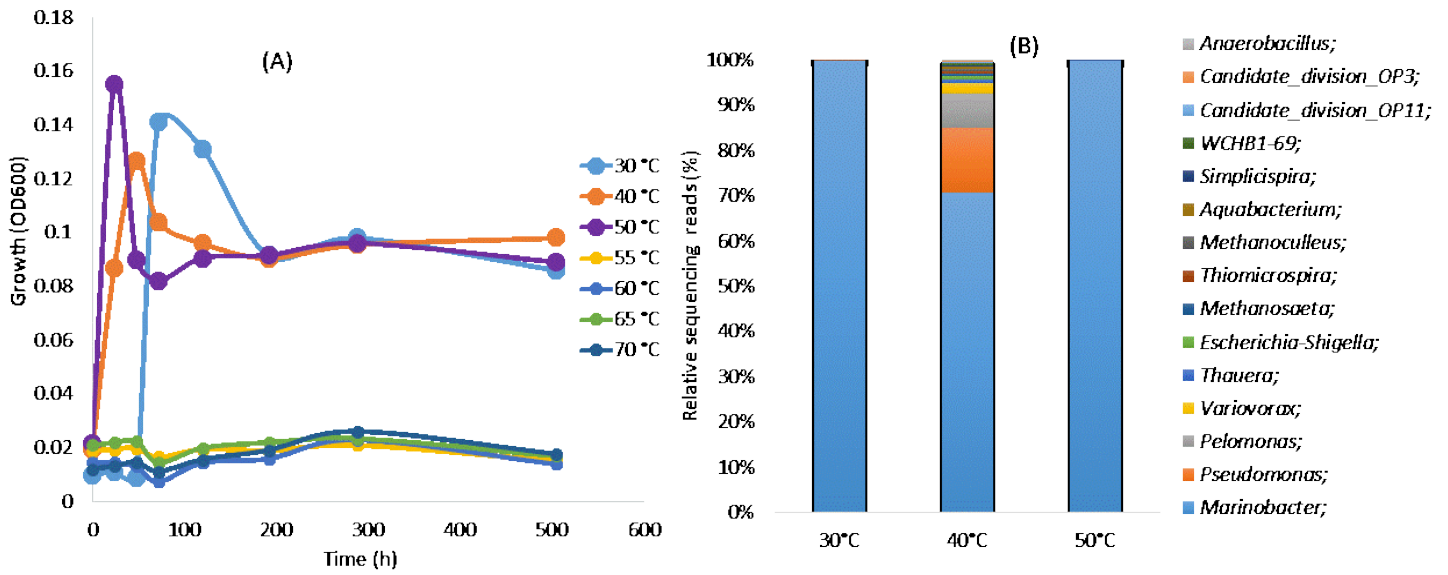

**Figure S2. Effect of incubation temperature on growth and community composition of cultures inoculated with the IW5\_15 primary tNRB enrichment, obtained at 50°C. Growth (A) and community composition (B) are shown for cultures at the indicated temperatures.**

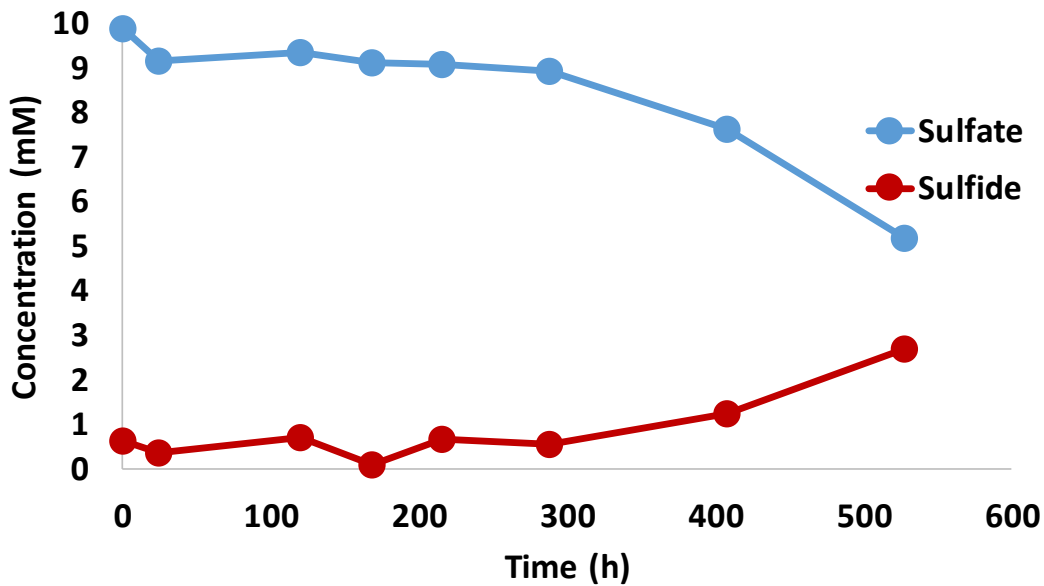

**Figure S3. Sulfate reduction by tSRB enriched from PW1\_14 at 70°C.**
